# Supplementary material for: Development of a highly sensitive liquid biopsy platform to detect clinically-relevant cancer mutations at low allele fractions in cell-free DNA
Source: PubMed Central journal article supplement (PMC5856404; doi:10.1371/journal.pone.0194630), 2018-03-16
Supplement: pone.0194630.s006.pdf [file pone.0194630.s006.pdf]

**Table S6. dMIQE checklist for authors, reviewers and editors**

| ITEM TO CHECK                                                                  | IMPORTANCE | CHECKLIST                                                                                                |
|--------------------------------------------------------------------------------|------------|----------------------------------------------------------------------------------------------------------|
| <b>EXPERIMENTAL DESIGN</b>                                                     |            |                                                                                                          |
| Definition of experimental and control groups                                  | E          | Methods                                                                                                  |
| Number within each group                                                       | E          | Methods                                                                                                  |
| Assay carried out by core lab or investigator's lab?                           | D          | LGC                                                                                                      |
| Power analysis                                                                 | D          | ND                                                                                                       |
| <b>SAMPLE</b>                                                                  |            |                                                                                                          |
| Description                                                                    | E          | Methods                                                                                                  |
| Volume/mass of sample processed                                                | D          | Methods                                                                                                  |
| Microdissection or macrodissection                                             | E          | N/A                                                                                                      |
| Processing procedure                                                           | E          | Methods (plasma homogenisation)                                                                          |
| If frozen - how and how quickly?                                               | E          | Methods                                                                                                  |
| If fixed - with what, how quickly?                                             | E          | N/A                                                                                                      |
| Sample storage conditions and duration (especially for FPPE samples)           | E          | -80 °C, 6 weeks after preparation of pooled plasma                                                       |
| <b>NUCLEIC ACID EXTRACTION</b>                                                 |            |                                                                                                          |
| Quantification - instrument/method                                             | E          | N/A (dPCR only)                                                                                          |
| DNA or RNA quantification                                                      | E          | DNA                                                                                                      |
| Quality/Integrity, method/instrument, e.g. RNA integrity                       | E          | See sheet "Bioanalyzer"                                                                                  |
| Template structural information                                                | E          | N/A                                                                                                      |
| Template modification (digestion, sonication, preamplification etc)            | E          | N/A                                                                                                      |
| Template treatment (initial heating or chemical denaturation)                  | E          | N/A                                                                                                      |
| Inhibition dilution or spike                                                   | E          | See Sheet "Inhibition testing"                                                                           |
| DNA contamination assessment of RNA samples                                    | E          | N/A                                                                                                      |
| Details of DNase treatment where performed                                     | E          | N/A                                                                                                      |
| Manufacturer of reagents used and catalogue number                             | D          | Qiagen, part number: 55114                                                                               |
| Storage of nucleic acid (temperature, concentration, duration and buffer)      | E          | Samples for dPCR stored undiluted in aliquots at -20 °C for max. of 1 month                              |
| <b>REVERSE TRANSCRIPTION (if necessary)</b>                                    |            |                                                                                                          |
| cDNA priming method and concentration                                          | E          | N/A                                                                                                      |
| One or two-step protocol                                                       | E          | N/A                                                                                                      |
| Amount of RNA used per reaction                                                | E          | N/A                                                                                                      |
| Detailed reaction components and conditions                                    | E          | N/A                                                                                                      |
| RT efficiency                                                                  | D          | N/A                                                                                                      |
| Estimated copies measured with and without addition of RT*                     | D          | N/A                                                                                                      |
| Manufacturer of reagents and catalogue numbers                                 | D          | N/A                                                                                                      |
| Reaction volume                                                                | D          | N/A                                                                                                      |
| Storage conditions of cDNA (temperature, concentration, duration and buffer)   | D          | N/A                                                                                                      |
| <b>dPCR TARGET INFORMATION</b>                                                 |            |                                                                                                          |
| Sequence accession number                                                      | E          | Supplementary information (COSMIC ID)                                                                    |
| Amplicon location                                                              | D          |                                                                                                          |
| Amplicon length                                                                | E          | Supplementary information                                                                                |
| In silico specificity screen (BLAST, etc)                                      | E          | See file "dPCR assay validation"                                                                         |
| Pseudogenes, retrospseudogenes or other homologs?                              | D          | See file "dPCR assay validation"                                                                         |
| Sequence alignment                                                             | D          | See file "dPCR assay validation"                                                                         |
| Secondary structure analysis of amplicon and GC content                        | D          | ND                                                                                                       |
| Location of each primer by exon or intron (if applicable)                      | E          | N/A                                                                                                      |
| Where appropriate, which splice variants are targeted?                         | E          | N/A                                                                                                      |
| <b>dPCR OLIGONUCLEOTIDES</b>                                                   |            |                                                                                                          |
| Primer sequences and/or amplicon context sequence**                            | E          | Supplementary information                                                                                |
| RTPrimerDB Identification Number                                               | D          | ND                                                                                                       |
| Probe sequences**                                                              | D          | Supplementary information                                                                                |
| Location and identity of any modifications                                     | E          | Supplementary information                                                                                |
| Manufacturer of oligonucleotides                                               | D          | Methods                                                                                                  |
| Purification method                                                            | D          | Primers: Reverse Phase Cartridge; Probes: HPLC                                                           |
| <b>dPCR PROTOCOL</b>                                                           |            |                                                                                                          |
| Complete reaction conditions                                                   | E          | Methods                                                                                                  |
| Reaction volume and amount of cDNA/DNA                                         | E          | Methods                                                                                                  |
| Primer, (probe), Mg <sup>++</sup> and dNTP concentrations                      | E          | Supplementary information                                                                                |
| Polymerase identity and concentration                                          | E          | Methods                                                                                                  |
| Buffer/kit identity and manufacturer                                           | E          | Methods                                                                                                  |
| Exact chemical constitution of the buffer                                      | D          | Not available (Proprietary)                                                                              |
| Additives (SYBR Green I, DMSO, etc.)                                           | E          | Not available (Proprietary)                                                                              |
| Plates/tubes catalogue number and manufacturer                                 | D          | Eppendorf™ twin.tec™ PCR Plates; Fisher Scientific; 10767294                                             |
| Complete thermocycling parameters                                              | E          | Supplementary information                                                                                |
| Reaction setup (manual/robotic)                                                | D          | Manual droplet generation with DG8                                                                       |
| Gravimetric or volumetric dilutions (manual/robotic)                           | D          | Plasma extracts analysed without dilution                                                                |
| Total PCR volume prepared                                                      | D          | 22 µl                                                                                                    |
| Partition number                                                               | E          | Mean 15282 ± SD 1683                                                                                     |
| Individual partition volume                                                    | E          | 0.85 nL                                                                                                  |
| Total volume of the partitions measured (effective reaction size)              | E          | Mean 13 µl (to 1 d.p.)                                                                                   |
| Partition volume variance/SD                                                   | D          | ND                                                                                                       |
| Comprehensive details and appropriate use of controls                          | E          | Supplementary information                                                                                |
| Manufacturer of dPCR instrument                                                | E          | Methods                                                                                                  |
| <b>dPCR VALIDATION</b>                                                         |            |                                                                                                          |
| Optimisation data for the assay                                                | D          | See file "dPCR assay validation"                                                                         |
| Specificity (when measuring rare mutations, pathogen sequences etc)            | E          | See file "dPCR assay validation"                                                                         |
| Limit of detection of calibration control                                      | D          | Supplementary information                                                                                |
| If multiplexing, comparison with singleplex assays                             | E          | N/A                                                                                                      |
| <b>DATA ANALYSIS</b>                                                           |            |                                                                                                          |
| Mean copies per partition (λ or equivalent)                                    | E          | See "dPCR data" sheet in this file                                                                       |
| dPCR analysis program (source, version)                                        | E          | Methods                                                                                                  |
| Outlier identification and disposition                                         | E          | 1 extract (#30) removed from analysis due to low yield (WT DNA) (<50% of value for other spiked samples) |
| Results of NTCs                                                                | E          | See "dPCR data" sheet in this file                                                                       |
| Examples of positive(s) and negative experimental results as supplemental data | E          | Supplementary information                                                                                |
| Where appropriate, justification of number and choice of reference genes       | E          | N/A                                                                                                      |
| Where appropriate, description of normalization method                         | E          | N/A                                                                                                      |
| Number and concordance of biological replicates                                | D          | N/A (technical replicates at extraction stage presented in Figures and Supplementary Figures)            |
| Number and stage (RT or qPCR) of technical replicates                          | E          | n = 1 dPCR replicate per extract per target; n = 3 controls (non-spiked DNA)                             |
| Repeatability (intra-assay variation)                                          | E          | See "Assay repeatability" sheet in this file                                                             |
| Reproducibility (inter-assay/user/lab etc variation)                           | D          | Available upon request                                                                                   |
| Experimental variance or CI***                                                 | E          | Supplementary Figures (precision for replicate extractions)                                              |
| Statistical methods for analysis                                               | E          | Precision metrics (SD) calculated using Microsoft Excel                                                  |
| Data submission using RDML (Real-time PCR Data Markup Language)                | D          |                                                                                                          |

All essential information (E) must be submitted with the manuscript. Desirable information (D) should be submitted if possible.

\* Assessing the absence of DNA using a no RT assay (or where RT has been inactivated) is essential when first extracting RNA. Once the sample has been validated as DNA-free, inclusion of a no-RT control is desirable, but no longer essential.

\*\* Disclosure of the primer and probe sequence is highly desirable and strongly encouraged. However, since not all commercial pre-designed assay vendors provide this information when it is not available assay context sequences must be submitted.

\*\*\* When single dPCR experiments are performed, the variation due to counting error alone

**dMIQE Information: DNA quality: plasma cfDNA extracts**

cfDNA isolated from pooled plasma (not spiked with Horizon cfDNA Reference Standards) was analysed using the Agilent 2100 Bioanalyzer with the High Sensitivity DNA Assay version 1.03.

Extracts (1-9) show typical pattern for cfDNA consisting of ~ 180 bp peak and longer (>1 kb) molecular weight DNA. (Samples 10 and 11 are replicates of the size ladder provided with the kit).

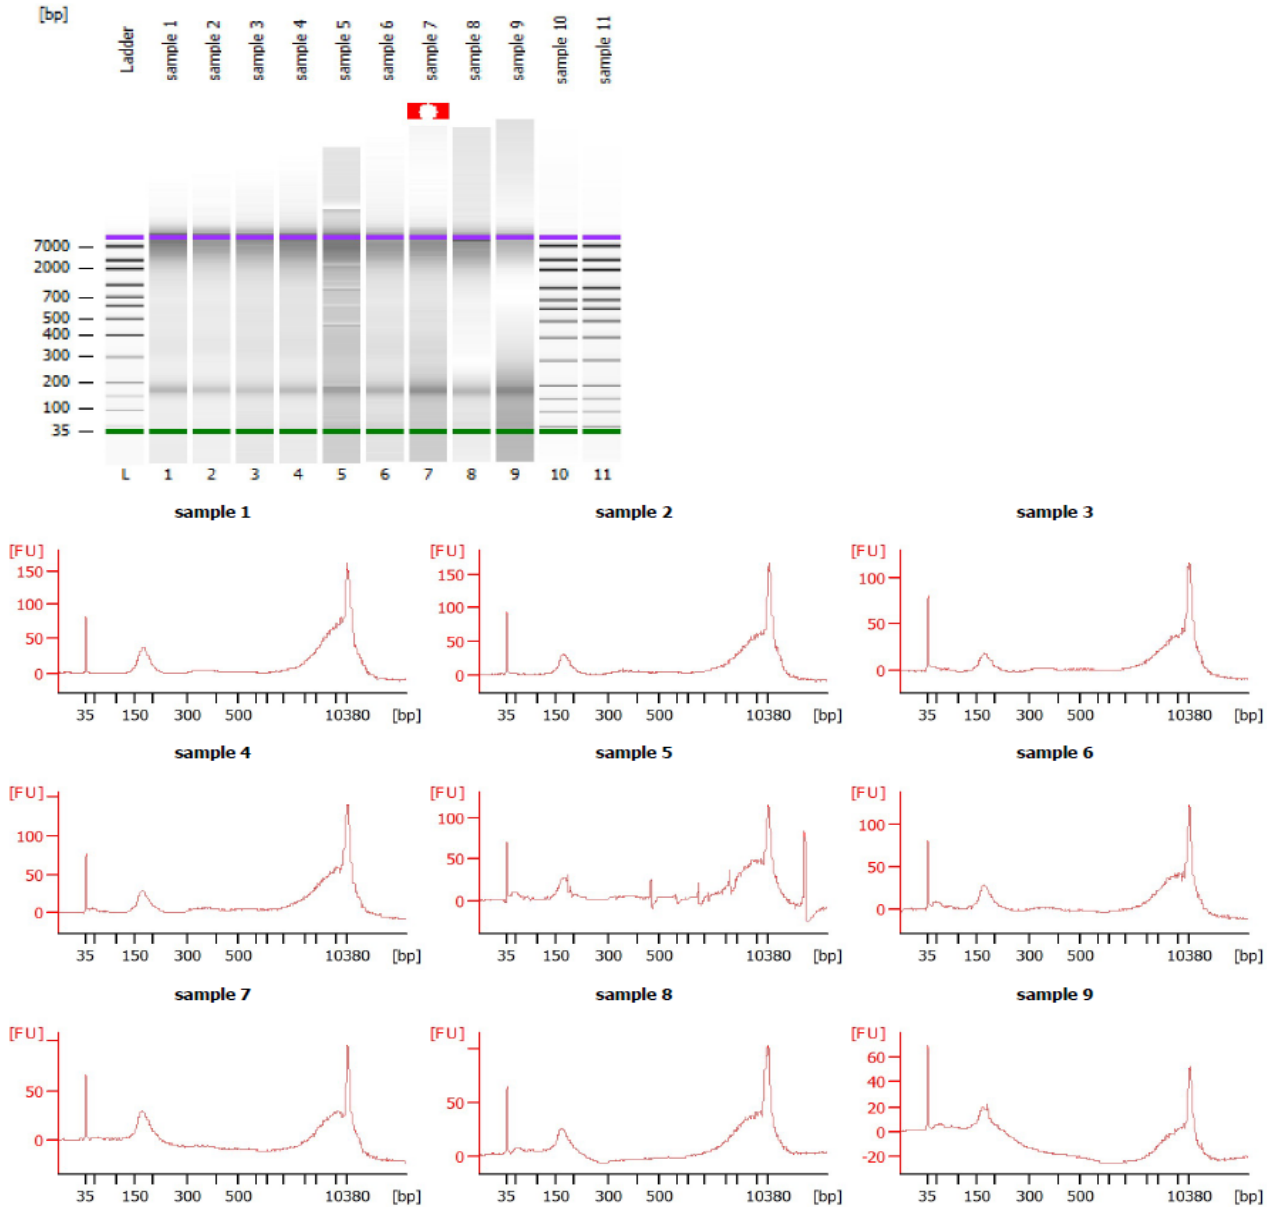

### dMIQE information: Assay inhibition testing: testing for inhibition by plasma cDNA extracts

8 ng Horizon gDNA Reference Standards (Table 1) were added per 20  $\mu$ L dPCR assay with/without 5  $\mu$ L of plasma extract from unspiked plasma (prepared as in Materials and Methods).

**Table: Control materials using for inhibition testing**

| Gene   | Variant | Cat No  | Lot   | % Mutant AF |
|--------|---------|---------|-------|-------------|
| EGFR   | L858R   | HD-C885 | 15664 | 50%         |
| KRAS   | G12D    | HD-C889 | 15668 | 50%         |
| NRAS   | E545K   | HD697   | 11263 | 50%         |
| PI3KCA | A59T    | HD689   | 11826 | 50%         |

No difference in the quantity of the mutant allele was observed in the reactions spiked with plasma extract (Figure).

### Inhibition testing of plasma extracts

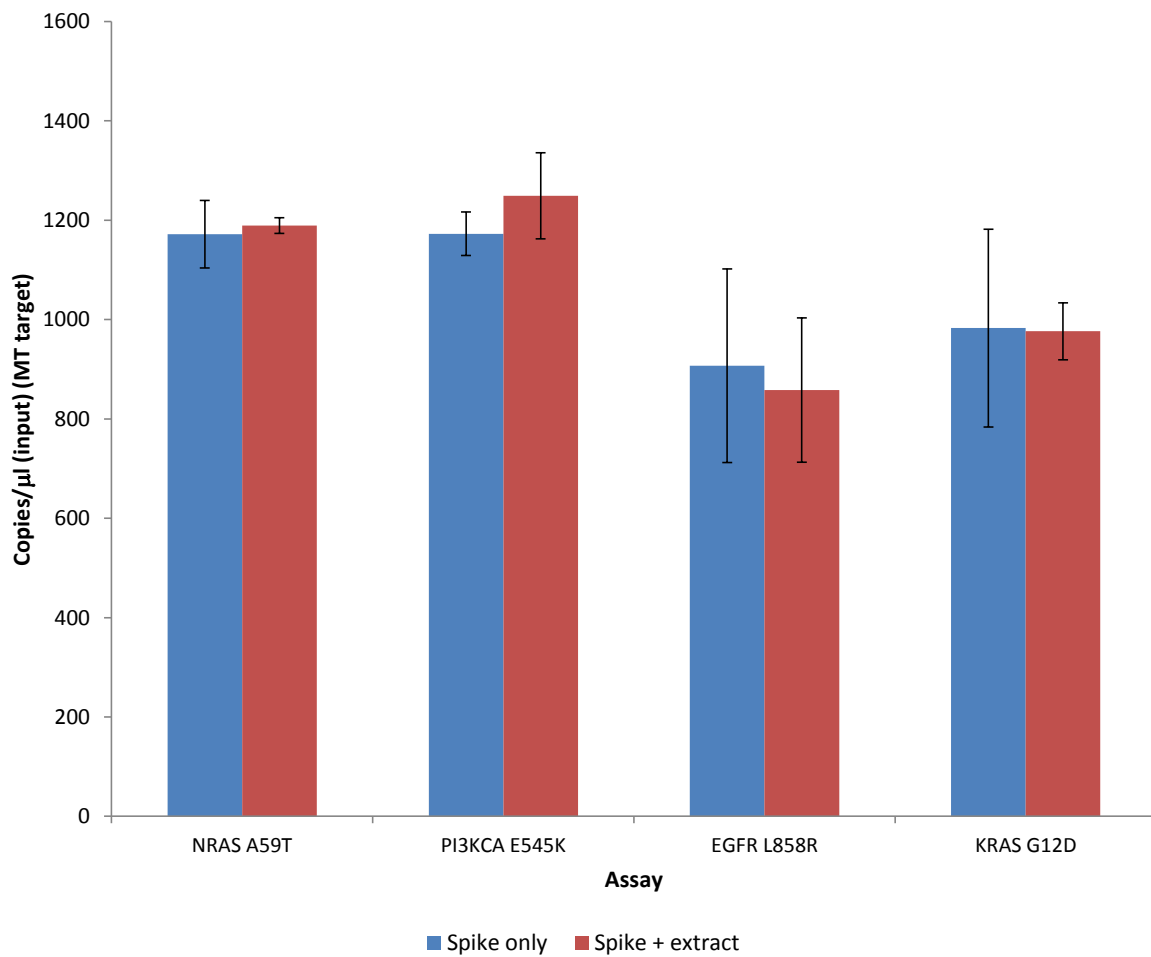

dMIQE information: Experimental dPCR data

| Sample Number | Spike mAF   | NRAS A59T |      |       |         | KRAS G12D |      |       |         | EGFR L858R |      |       |         | PIK3CA E545K |      |       |         |
|---------------|-------------|-----------|------|-------|---------|-----------|------|-------|---------|------------|------|-------|---------|--------------|------|-------|---------|
|               |             | k mt      | k wt | n     | λ       | k mt      | k wt | n     | λ       | k mt       | k wt | n     | λ       | k mt         | k wt | n     | λ       |
| 1             | Plasma only | 0         | 250  | 12932 | 0.00000 | 0         | 330  | 14618 | 0.00000 | 0          | 364  | 13900 | 0.00000 | 0            | 284  | 12417 | 0.00000 |
| 2             | 5.00%       | 67        | 1396 | 12115 | 0.006   | 117       | 2230 | 15362 | 0.008   | 75         | 1923 | 12483 | 0.006   | 62           | 1373 | 11944 | 0.005   |
| 3             | 1.00%       | 18        | 1687 | 13522 | 0.001   | 22        | 2225 | 14356 | 0.002   | 15         | 2012 | 11481 | 0.001   | 13           | 1570 | 12456 | 0.001   |
| 4             | 0.10%       | 1         | 2063 | 13316 | 0.00008 | 6         | 3237 | 15988 | 0.0004  | 0          | 2764 | 13038 | 0.00000 | 4            | 2048 | 12431 | 0.0003  |
| 5             | 0.00%       | 1         | 1318 | 12514 | 0.00008 | 0         | 1935 | 14447 | 0.00000 | 0          | 1922 | 13163 | 0.00000 | 1            | 1616 | 14686 | 0.00007 |
| 6             | Plasma only | 0         | 423  | 12707 | 0.00000 | 0         | 580  | 14845 | 0.00000 | 0          | 533  | 12580 | 0.00000 | 0            | 480  | 13076 | 0.00000 |
| 7             | 5.00%       | 80        | 1492 | 14973 | 0.005   | 104       | 2087 | 15625 | 0.007   | 70         | 1741 | 12077 | 0.006   | 78           | 1666 | 15117 | 0.005   |
| 8             | 1.00%       | 23        | 2382 | 15282 | 0.002   | 35        | 3042 | 15781 | 0.002   | 24         | 2935 | 14283 | 0.002   | 14           | 1157 | 7633  | 0.002   |
| 9             | 0.10%       | 4         | 1568 | 15144 | 0.0003  | 4         | 2042 | 13983 | 0.0003  | 0          | 1991 | 14224 | 0.0000  | 5            | 1577 | 14450 | 0.0003  |
| 10            | 0.00%       | 0         | 1245 | 13417 | 0.00000 | 1         | 1776 | 15653 | 0.00006 | 0          | 1640 | 12578 | 0.00000 | 0            | 1444 | 15337 | 0.00000 |
| 11            | 0.10%       | 4         | 2336 | 15185 | 0.0003  | 1         | 3827 | 17686 | 0.0001  | 4          | 3413 | 14952 | 0.0003  | 6            | 2817 | 17316 | 0.0003  |
| 12            | 5.00%       | 123       | 2368 | 15071 | 0.008   | 189       | 3517 | 17751 | 0.01    | 118        | 3054 | 13828 | 0.009   | 149          | 2688 | 16202 | 0.009   |
| 13            | 0.10%       | 4         | 2389 | 13388 | 0.0003  | 9         | 3039 | 13104 | 0.0007  | 6          | 2963 | 12113 | 0.0005  | 4            | 2277 | 12572 | 0.0003  |
| 14            | 0.00%       | 0         | 1574 | 15230 | 0.00000 | 1         | 2290 | 16883 | 0.00006 | 0          | 2131 | 14614 | 0.00000 | 0            | 1866 | 17017 | 0.00000 |
| 15            | 1.00%       | 11        | 1642 | 14483 | 0.0008  | 20        | 2341 | 15490 | 0.001   | 15         | 2135 | 13283 | 0.001   | 28           | 1891 | 16256 | 0.002   |
| 16            | Plasma only | 0         | 448  | 14981 | 0.00000 | 0         | 578  | 17218 | 0.00000 | 0          | 523  | 14788 | 0.00000 | 0            | 477  | 15169 | 0.00000 |
| 17            | 5.00%       | 87        | 2012 | 16208 | 0.005   | 143       | 2794 | 16957 | 0.008   | 89         | 2458 | 14126 | 0.006   | 108          | 2114 | 16364 | 0.007   |
| 18            | Plasma only | 0         | 461  | 13285 | 0.00000 | 0         | 553  | 14068 | 0.00000 | 0          | 574  | 13878 | 0.00000 | 0            | 480  | 13737 | 0.00000 |
| 19            | 0.00%       | 0         | 2791 | 15093 | 0.00000 | 0         | 3283 | 15755 | 0.00000 | 1          | 3086 | 12702 | 0.00008 | 0            | 3158 | 16998 | 0.00000 |
| 20            | 1.00%       | 24        | 1908 | 14593 | 0.002   | 40        | 2891 | 17107 | 0.002   | 21         | 2714 | 15316 | 0.001   | 20           | 2273 | 17046 | 0.001   |
| 21            | 1.00%       | 26        | 2463 | 15830 | 0.002   | 37        | 3259 | 17331 | 0.002   | 21         | 3474 | 16732 | 0.001   | 31           | 2903 | 15763 | 0.002   |
| 22            | 0.00%       | 0         | 1198 | 13275 | 0.00000 | 0         | 2229 | 16976 | 0.00000 |            | 2120 | 15690 | 0.00000 | 0            | 1808 | 17726 | 0.00000 |
| 23            | 0.10%       | 3         | 1813 | 14477 | 0.0002  | 3         | 2592 | 15803 | 0.0002  | 1          | 2666 | 15630 | 0.0001  | 3            | 2193 | 17678 | 0.0002  |
| 24            | 0.00%       | 0         | 2863 | 15835 | 0.00000 | 1         | 3541 | 15547 | 0.00006 | 0          | 3745 | 16125 | 0.00000 | 1            | 2908 | 15817 | 0.00006 |
| 25            | Plasma only | 0         | 654  | 15778 | 0.0000  | 1         | 858  | 16778 | 0.0001  | 0          | 752  | 14803 | 0.00000 | 0            | 807  | 16019 | 0.0000  |
| 26            | 5.00%       | 78        | 1735 | 15978 | 0.005   | 110       | 2298 | 15909 | 0.007   | 98         | 2533 | 15990 | 0.006   | 124          | 2101 | 18381 | 0.007   |
| 27            | Plasma only | 0         | 508  | 14921 | 0.00000 | 0         | 541  | 16531 | 0.00000 | 0          | 514  | 14193 | 0.00000 | 0            | 478  | 15658 | 0.00000 |
| 28            | 1.00%       | 18        | 2015 | 16293 | 0.001   | 29        | 2677 | 16394 | 0.002   | 21         | 2478 | 15033 | 0.001   | 32           | 2033 | 16229 | 0.002   |
| 29            | 0.10%       | 1         | 1319 | 14790 | 0.00007 | 1         | 1834 | 16941 | 0.00006 | 0          | 1544 | 13703 | 0.00000 | 3            | 1120 | 13405 | 0.00022 |
| 30            | 5.00%       | 38        | 790  | 16405 | 0.002   | 55        | 883  | 14613 | 0.004   | 45         | 1053 | 15707 | 0.003   | 37           | 763  | 15919 | 0.002   |
| NTC TE        | NA          | 0         | 0    | 13966 | 0.00000 | 0         | 1    | 17042 | 0.00000 | 0          | 0    | 14453 | 0.00000 | 0            | 0    | 19061 | 0.00000 |
| NTC TE        | NA          | 0         | 2    | 15829 | 0.00000 | 1         | 0    | 15577 | 0.00006 | 0          | 1    | 15069 | 0.00000 | 0            | 0    | 14575 | 0.00000 |
| NTC TE        | NA          | 0         | 0    | 15925 | 0.00000 | 0         | 3    | 16987 | 0.00000 | 0          | 0    | 14783 | 0.00000 | 0            | 0    | 19025 | 0.00000 |
| NTC H2O       | NA          | 0         | 0    | 17291 | 0.00000 | 0         | 2    | 17756 | 0.00000 | 0          | 0    | 12852 | 0.00000 | 0            | 0    | 15828 | 0.00000 |
| NTC H2O       | NA          | 0         | 3    | 17606 | 0.00000 | 0         | 2    | 15890 | 0.00000 | 0          | 0    | 17364 | 0.00000 | 0            | 0    | 17177 | 0.00000 |
| NTC H2O       | NA          | 0         | 1    | 17331 | 0.00000 | 0         | 4    | 17023 | 0.00000 | 0          | 0    | 15919 | 0.00000 | 0            | 0    | 16548 | 0.00000 |

**dMIQE information: Assay repeatability**

Assay performance was tested with a 5 point 5-fold dilution series of gDNA Reference Standard (50% mAF) (Horizon, P/Ns below) from 40 ng to 0.064 ng/reaction (MT1 to MT5).

| Gene   | Mutation | Horizon P/N |
|--------|----------|-------------|
| EGFR   | L858R    | HD-C885     |
| KRAS   | G12D     | HD-C889     |
| NRAS   | A59T     | HD-C891     |
| PI3KCA | E545K    | HD-C892     |

| Experimental set-up           | Sample | Positive droplets | Negative droplets | Accepted droplets | $\lambda$ | Mutant concentration                          |       | Mutant Allelic Frequency (mAF) (%) |      |       |     |
|-------------------------------|--------|-------------------|-------------------|-------------------|-----------|-----------------------------------------------|-------|------------------------------------|------|-------|-----|
|                               |        |                   |                   |                   |           | Input (c/ $\mu$ l) (5 ul sample per reaction) | Value | Poisson error                      | Mean | SD    | %CV |
| <b>Assay: EGFR L858R/WT</b>   |        |                   |                   |                   |           |                                               |       |                                    |      |       |     |
| ABS                           | MT1    | 1073              | 12123             | 13196             | 0.0848    | 998                                           | 50.2  | 2                                  | 49.4 | 1.00  | 2%  |
| ABS                           | MT1    | 1186              | 14302             | 15488             | 0.0797    | 937                                           | 49.8  | 2                                  |      |       |     |
| ABS                           | MT1    | 1210              | 14542             | 15752             | 0.0799    | 940                                           | 48.3  | 2                                  |      |       |     |
| ABS                           | MT2    | 242               | 14015             | 14257             | 0.0171    | 201                                           | 48.5  | 4                                  | 48.7 | 1.86  | 4%  |
| ABS                           | MT2    | 244               | 16017             | 16261             | 0.0151    | 178                                           | 46.9  | 4                                  |      |       |     |
| ABS                           | MT2    | 267               | 16075             | 16342             | 0.0165    | 194                                           | 50.6  | 4                                  |      |       |     |
| ABS                           | MT3    | 42                | 12877             | 12919             | 0.0033    | 38                                            | 52.0  | 11                                 | 49.0 | 7.94  | 16% |
| ABS                           | MT3    | 44                | 16926             | 16970             | 0.0026    | 31                                            | 40.0  | 10                                 |      |       |     |
| ABS                           | MT3    | 61                | 16793             | 16854             | 0.0036    | 43                                            | 55.0  | 9                                  |      |       |     |
| ABS                           | MT4    | 10                | 14429             | 14439             | 0.0007    | 8                                             | 48.0  | 21                                 | 48.0 | 4.00  | 8%  |
| ABS                           | MT4    | 14                | 16087             | 16101             | 0.0009    | 10                                            | 44.0  | 17                                 |      |       |     |
| ABS                           | MT4    | 12                | 15508             | 15520             | 0.0008    | 9                                             | 52.0  | 21                                 |      |       |     |
| ABS                           | MT5    | 2                 | 14163             | 14165             | 0.0001    | 2                                             | 40.0  | 47                                 | 53.3 | 15.28 | 29% |
| ABS                           | MT5    | 2                 | 17319             | 17321             | 0.0001    | 1                                             | 70.0  | 60                                 |      |       |     |
| ABS                           | MT5    | 3                 | 16525             | 16528             | 0.0002    | 2                                             | 50.0  | 43                                 |      |       |     |
| <b>Assay: KRAS G12D/WT</b>    |        |                   |                   |                   |           |                                               |       |                                    |      |       |     |
| ABS                           | MT1    | 2132              | 10669             | 12801             | 0.1822    | 857                                           | 50.1  | 2                                  | 50.4 | 0.79  | 2%  |
| ABS                           | MT1    | 2088              | 10656             | 12744             | 0.1789    | 842                                           | 49.8  | 2                                  |      |       |     |
| ABS                           | MT1    | 2730              | 13443             | 16173             | 0.1849    | 870                                           | 51.3  | 1                                  |      |       |     |
| ABS                           | MT2    | 487               | 13305             | 13792             | 0.0359    | 169                                           | 52.0  | 3                                  | 51.4 | 1.46  | 3%  |
| ABS                           | MT2    | 480               | 13509             | 13989             | 0.0349    | 164                                           | 49.7  | 3                                  |      |       |     |
| ABS                           | MT2    | 584               | 15515             | 16099             | 0.0369    | 174                                           | 52.4  | 3                                  |      |       |     |
| ABS                           | MT3    | 110               | 15772             | 15882             | 0.0070    | 33                                            | 45.0  | 6                                  | 46.0 | 1.00  | 2%  |
| ABS                           | MT3    | 109               | 15826             | 15935             | 0.0069    | 32                                            | 47.0  | 6                                  |      |       |     |
| ABS                           | MT3    | 108               | 16074             | 16182             | 0.0067    | 32                                            | 46.0  | 7                                  |      |       |     |
| ABS                           | MT4    | 39                | 14747             | 14786             | 0.0026    | 12                                            | 63.0  | 12                                 | 51.7 | 11.02 | 21% |
| ABS                           | MT4    | 20                | 15277             | 15297             | 0.0013    | 6                                             | 41.0  | 14                                 |      |       |     |
| ABS                           | MT4    | 24                | 16354             | 16378             | 0.0015    | 7                                             | 51.0  | 14                                 |      |       |     |
| ABS                           | MT5    | 4                 | 15025             | 15029             | 0.0003    | 1                                             | 57.0  | 39                                 | 35.7 | 18.72 | 52% |
| ABS                           | MT5    | 4                 | 15530             | 15534             | 0.0003    | 1                                             | 22.0  | 20                                 |      |       |     |
| ABS                           | MT5    | 5                 | 16641             | 16646             | 0.0003    | 1                                             | 28.0  | 21                                 |      |       |     |
| <b>Assay: NRAS A59T/WT</b>    |        |                   |                   |                   |           |                                               |       |                                    |      |       |     |
| ABS                           | MT1    | 3268              | 14011             | 17279             | 0.2096    | 987                                           | 50.2  | 1                                  | 49.7 | 0.46  | 1%  |
| ABS                           | MT1    | 3307              | 14354             | 17661             | 0.2073    | 976                                           | 49.6  | 1                                  |      |       |     |
| ABS                           | MT1    | 3238              | 14386             | 17624             | 0.2030    | 955                                           | 49.3  | 1                                  |      |       |     |
| ABS                           | MT2    | 694               | 16807             | 17501             | 0.0405    | 190                                           | 46.7  | 3                                  | 48.1 | 1.31  | 3%  |
| ABS                           | MT2    | 828               | 18863             | 19691             | 0.0430    | 202                                           | 49.3  | 2                                  |      |       |     |
| ABS                           | MT2    | 766               | 18470             | 19236             | 0.0406    | 191                                           | 48.2  | 3                                  |      |       |     |
| ABS                           | MT3    | 135               | 17042             | 17177             | 0.0079    | 37                                            | 45.0  | 6                                  | 48.3 | 2.89  | 6%  |
| ABS                           | MT3    | 143               | 18069             | 18212             | 0.0079    | 37                                            | 50.0  | 5                                  |      |       |     |
| ABS                           | MT3    | 150               | 16971             | 17121             | 0.0088    | 41                                            | 50.0  | 6                                  |      |       |     |
| ABS                           | MT4    | 29                | 19496             | 19525             | 0.0015    | 7                                             | 49.0  | 13                                 | 52.0 | 3.00  | 6%  |
| ABS                           | MT4    | 32                | 19465             | 19497             | 0.0016    | 8                                             | 55.0  | 13                                 |      |       |     |
| ABS                           | MT4    | 17                | 16350             | 16367             | 0.0010    | 5                                             | 52.0  | 17                                 |      |       |     |
| ABS                           | MT5    | 5                 | 19436             | 19441             | 0.0003    | 1                                             | 36.0  | 26                                 | 55.0 | 19.52 | 35% |
| ABS                           | MT5    | 6                 | 16201             | 16207             | 0.0004    | 2                                             | 75.0  | 33                                 |      |       |     |
| ABS                           | MT5    | 7                 | 18535             | 18542             | 0.0004    | 2                                             | 54.0  | 28                                 |      |       |     |
| <b>Assay: PI3KCA E545K/WT</b> |        |                   |                   |                   |           |                                               |       |                                    |      |       |     |
| ABS                           | MT1    | 3098              | 15802             | 18900             | 0.1790    | 842                                           | 49.1  | 1                                  | 49.5 | 0.46  | 1%  |
| ABS                           | MT1    | 3073              | 15562             | 18635             | 0.1802    | 848                                           | 50.0  | 1                                  |      |       |     |
| ABS                           | MT1    | 2888              | 14432             | 17320             | 0.1824    | 858                                           | 49.4  | 1                                  |      |       |     |
| ABS                           | MT2    | 529               | 16197             | 16726             | 0.0321    | 151                                           | 46.8  | 3                                  | 48.2 | 1.99  | 4%  |
| ABS                           | MT2    | 539               | 16255             | 16794             | 0.0326    | 154                                           | 47.4  | 3                                  |      |       |     |
| ABS                           | MT2    | 675               | 18548             | 19223             | 0.0357    | 168                                           | 50.5  | 3                                  |      |       |     |
| ABS                           | MT3    | 126               | 17668             | 17794             | 0.0071    | 33                                            | 48.0  | 7                                  | 48.7 | 1.15  | 2%  |
| ABS                           | MT3    | 115               | 16296             | 16411             | 0.0070    | 33                                            | 48.0  | 7                                  |      |       |     |
| ABS                           | MT3    | 154               | 19784             | 19938             | 0.0078    | 36                                            | 50.0  | 6                                  |      |       |     |
| ABS                           | MT4    | 29                | 19530             | 19559             | 0.0015    | 7                                             | 48.0  | 13                                 | 49.0 | 3.61  | 7%  |
| ABS                           | MT4    | 21                | 16487             | 16508             | 0.0013    | 6                                             | 46.0  | 14                                 |      |       |     |
| ABS                           | MT4    | 42                | 19450             | 19492             | 0.0022    | 10                                            | 53.0  | 11                                 |      |       |     |
| ABS                           | MT5    | 7                 | 19234             | 19241             | 0.0004    | 2                                             | 39.0  | 23                                 | 46.7 | 7.51  | 16% |
| ABS                           | MT5    | 7                 | 18105             | 18112             | 0.0004    | 2                                             | 47.0  | 26                                 |      |       |     |
| ABS                           | MT5    | 7                 | 19922             | 19929             | 0.0004    | 2                                             | 54.0  | 28                                 |      |       |     |
