# Supplementary material for: Development of a highly sensitive liquid biopsy platform to detect clinically-relevant cancer mutations at low allele fractions in cell-free DNA
Source: PubMed Central journal article supplement (PMC5856404; doi:10.1371/journal.pone.0194630), 2018-03-16
Supplement: pone.0194630.s007.pdf [file pone.0194630.s007.pdf]

# **dMIQE Information: Assay validation**

1. In silico specificity testing
2. dPCR assay optimisation
3. dPCR specificity testing (wet lab)

# 1. In silico specificity testing

- In silico specificity of primers checked using NCBI Primer Blast
- Primer and probe aligned to specific and non-specific chromosome regions using Geneious (version R8)

# In silico specificity testing: NRAS A59T/WT

## NCBI Primer Blast

>[NC\\_000001.11](#) Homo sapiens chromosome 1, GRCh38.p7 Primary Assembly

product length = 89

Features associated with this product:

[GTPase NRas](#)

```
Forward primer 1          GATGGTGAAACCTGTTTGTGGGA  23
Template       114713951  .....                114713929
```

```
Reverse primer 1          TCGCCTGTCCTCATGTATTGG  21
Template       114713863  .....                114713883
```

>[NC\\_000012.12](#) Homo sapiens chromosome 12, GRCh38.p7 Primary Assembly

product length = 89

Features associated with this product:

[GTPase KRas isoform b](#)

[GTPase KRas isoform X2](#)

```
Forward primer 1          GATGGTGAAACCTGTTTGTGGGA  23
Template       25227385  .....A.....C.C.....  25227363
```

```
Reverse primer 1          TCGCCTGTCCTCATGTATTGG  21
Template       25227297  ..C..A.....C...  25227317
```

>[NC\\_000006.12](#) Homo sapiens chromosome 6, GRCh38.p7 Primary Assembly

product length = 88

Features flanking this product:

[380797 bp at 5' side: tubulointerstitial nephritis antigen isoform X6](#)

[99438 bp at 3' side: protein FAM83B isoform X1](#)

```
Forward primer 1          GATGGTGAAACCTGTTTGTGGGA  23
Template       54770721  .....A.....C.C.....  54770743
```

```
Reverse primer 1          TCGCCTGTCCTCATGTATTGG  21
Template       54770808  CGC..A.....C...  54770788
```

# In silico specificity testing: NRAS A59T/WT

## Geneious primer and probe mapping (maximum 4 mismatches)

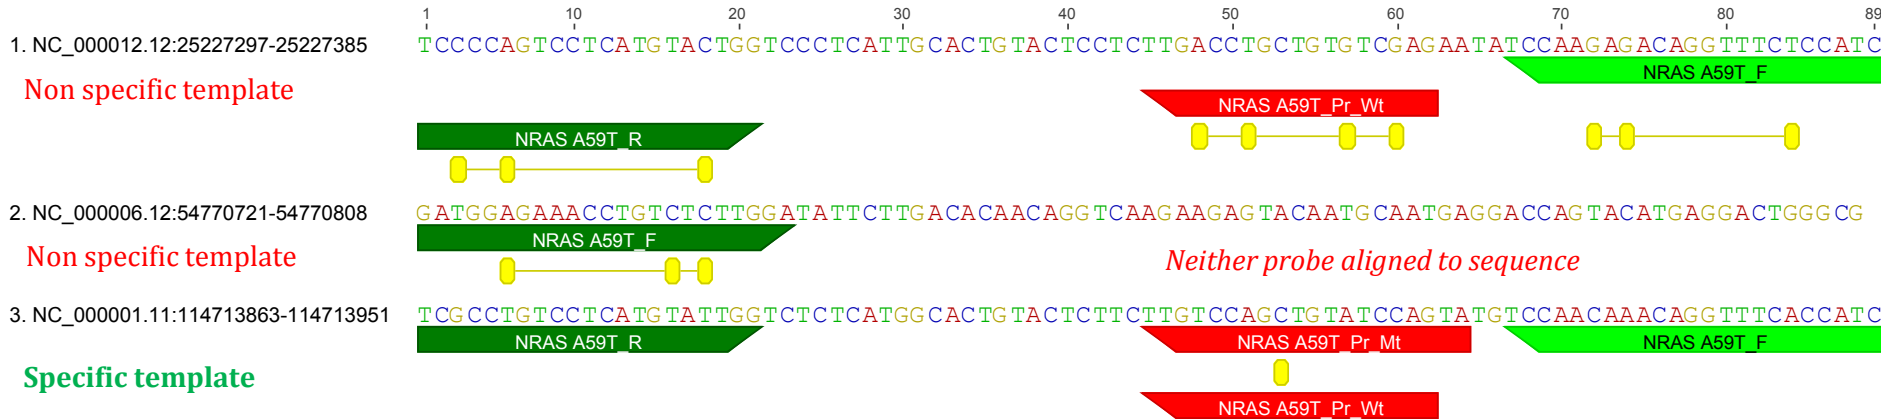

## Geneious alignment of primers to reference sequence (chromosome 6)

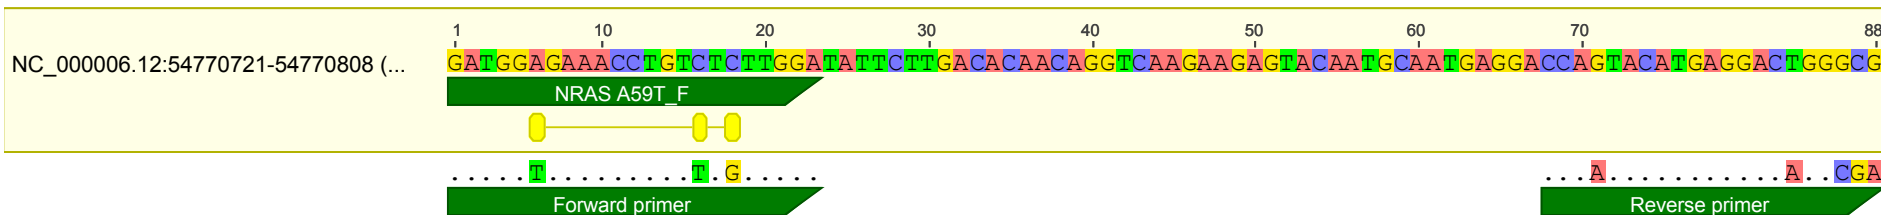

# In silico specificity testing: PI3KCA E545K/WT

## NCBI Primer Blast

>[NC\\_000003.12](#) Homo sapiens chromosome 3, GRCh38.p7 Primary Assembly

product length = 89

Features associated with this product:

[phosphatidylinositol 4,5-bisphosphate 3-kinase catalytic ...](#)

[phosphatidylinositol 4,5-bisphosphate 3-kinase catalytic ...](#)

Forward primer 1 GAACAGCTCAAAGCAATTTCTACAC 25  
Template 179218255 ..... 179218279

Reverse primer 1 AGCACTTACCTGTGACTCCATAG 23  
Template 179218343 ..... 179218321

>[NC\\_000022.11](#) Homo sapiens chromosome 22, GRCh38.p7 Primary Assembly

product length = 89

Features flanking this product:

[751417 bp at 5' side: uncharacterized protein LOC101929839](#)

[18716 bp at 3' side: T-complex protein 1 subunit theta-like 2](#)

Forward primer 1 GAACAGCTCAAAGCAATTTCTACAC 25  
Template 16572073 ..... 16572097

Reverse primer 1 AGCACTTACCTGTGACTCCATAG 23  
Template 16572160 .....-G..... 16572139

# In silico specificity testing: PI3KCA E545K/WT

Geneious primer mapping of primers and probes to PI3KCA pseudogene (maximum 4 mismatches)

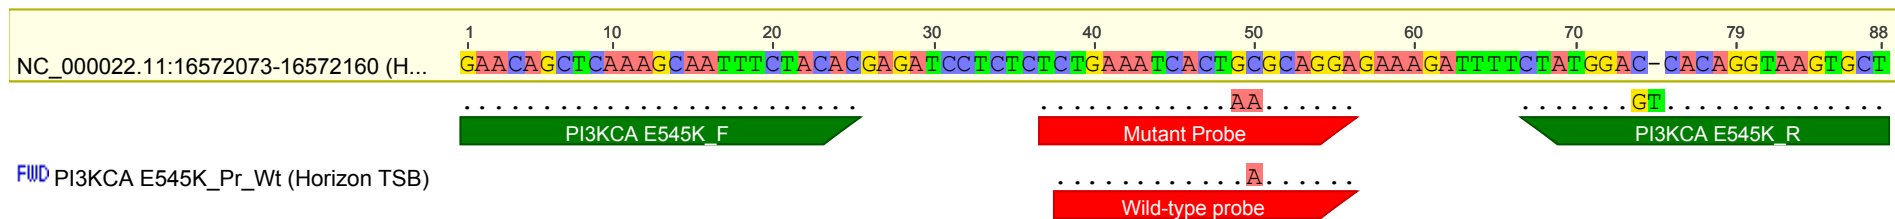

Amplification of PI3KCA pseudogene was minimised by selecting a higher annealing temperature during dPCR optimisation experiments (see Part 2 of this document).

## 2. dPCR assay optimisation

- In house assays to NRAS A59T and PIK3CA E545K were optimised by analysing a range of PCR annealing temperatures from 53°C - 65°C
- Horizon gDNA Reference Standards (50% mAF and 100% WT) at two concentrations were measured ( $\lambda 1$  and  $\lambda 2$ ):
  - Part number HD-C891 (50% NRAS A59T)
  - Part number HD-C892 (50% PI3KCA)
  - Part number HD-C884 (100% WT)
- The optimal annealing temperature setting is indicated by a green box

# NRAS A59T FAM/Cal Fluo Orange 650 (FAM/HEX settings). Same threshold settled for each temperature

**MT  $\lambda 1$  65.0 °C**  
(intact;  $\approx 8$  ng/rxn)

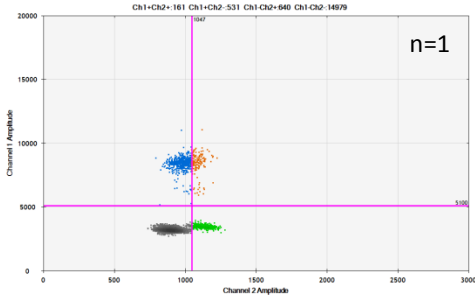

Threshold=> Ch1: 5100, Ch2: 1047

**MT  $\lambda 1$  65.0 °C**  
(intact;  $\approx 2$  ng/rxn)

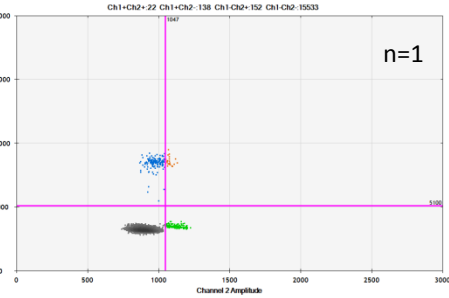

**WT  $\lambda 1$  65.0 °C**  
(intact;  $\approx 8$  ng/rxn)

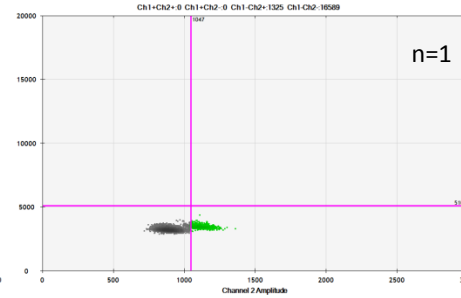

**WT  $\lambda 1$  65.0 °C**  
(intact;  $\approx 2$  ng/rxn)

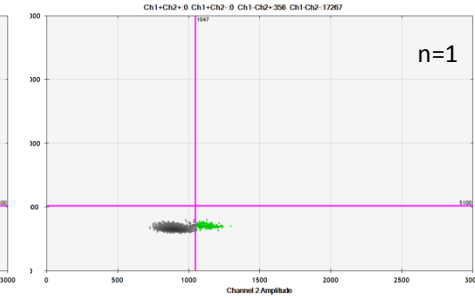

**MT  $\lambda 1$  62.7 °C**  
(intact;  $\approx 8$  ng/rxn)

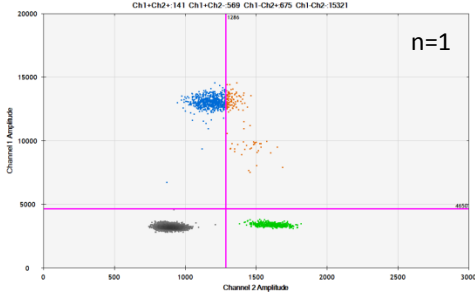

Threshold=> Ch1: 4650, Ch2: 1286

**MT  $\lambda 1$  62.7 °C**  
(intact;  $\approx 2$  ng/rxn)

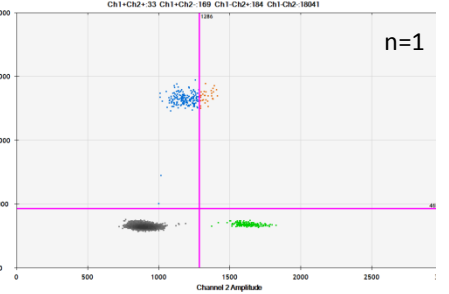

**WT  $\lambda 1$  62.7 °C**  
(intact;  $\approx 8$  ng/rxn)

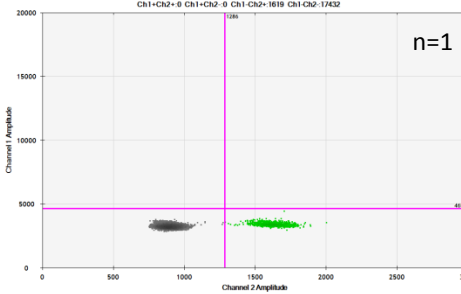

**WT  $\lambda 1$  62.7 °C**  
(intact;  $\approx 2$  ng/rxn)

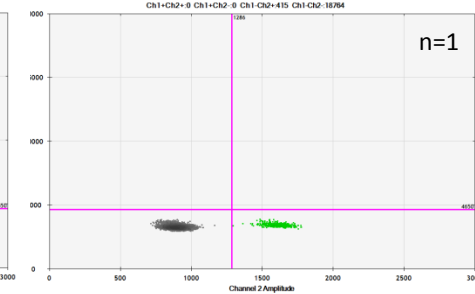

**MT  $\lambda 1$  60.4 °C**  
(intact;  $\approx 8$  ng/rxn)

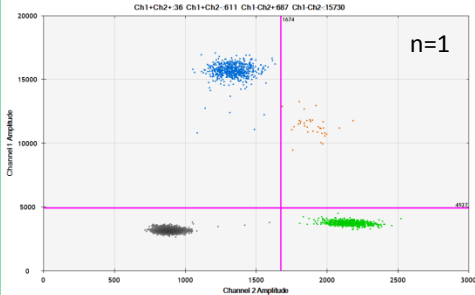

Threshold=> Ch1: 4927, Ch2: 1647

**MT  $\lambda 1$  60.4 °C**  
(intact;  $\approx 2$  ng/rxn)

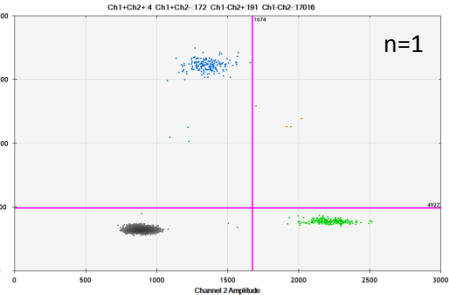

**WT  $\lambda 1$  60.4 °C**  
(intact;  $\approx 8$  ng/rxn)

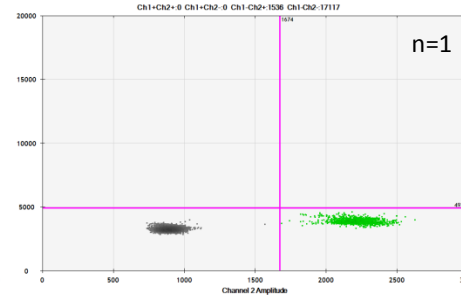

**WT  $\lambda 1$  60.4 °C**  
(intact;  $\approx 2$  ng/rxn)

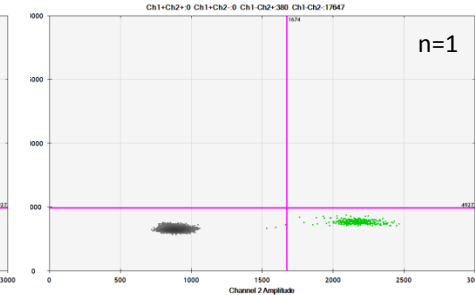



# NRAS A59T FAM/Cal Fluo Orange 650 (FAM/HEX settings). Threshold settled for each temperature

**MT  $\lambda 1$  57.8 °C**  
(intact;  $\approx 8$  ng/rxn)

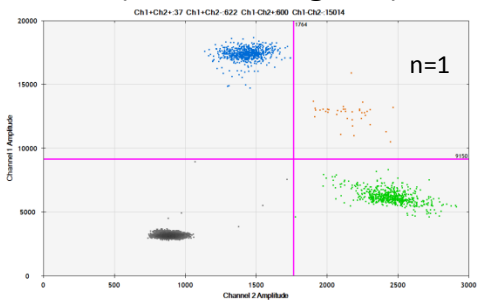

Threshold=> Ch1: 9150, Ch2: 1764

**MT  $\lambda 1$  57.8 °C**  
(intact;  $\approx 2$  ng/rxn)

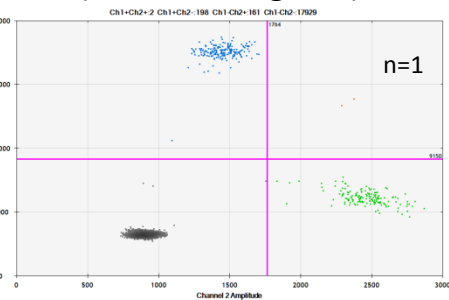

**WT  $\lambda 1$  57.8 °C**  
(intact;  $\approx 8$  ng/rxn)

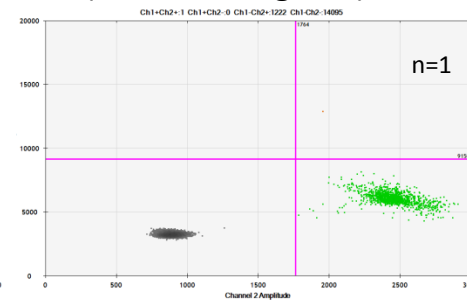

**WT  $\lambda 1$  57.8 °C**  
(intact;  $\approx 2$  ng/rxn)

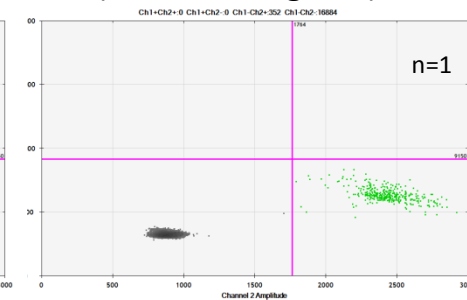

**MT  $\lambda 1$  55.4 °C**  
(intact;  $\approx 8$  ng/rxn)

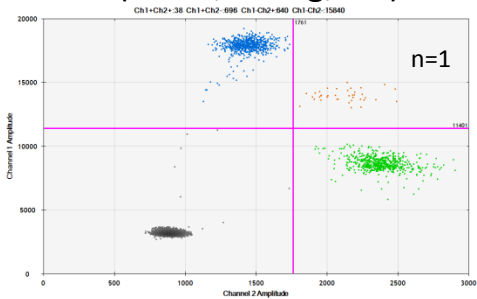

Threshold=> Ch1: 11401, Ch2: 1761

**MT  $\lambda 1$  55.4 °C**  
(intact;  $\approx 2$  ng/rxn)

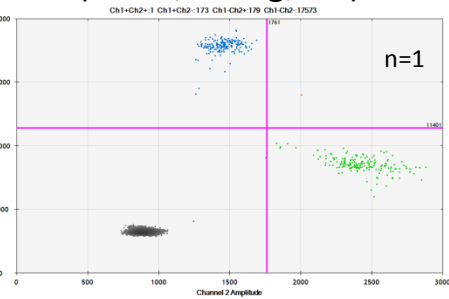

**WT  $\lambda 1$  55.4 °C**  
(intact;  $\approx 8$  ng/rxn)

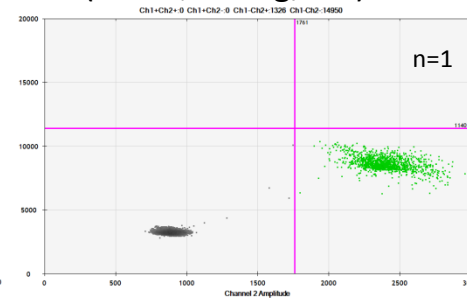

**WT  $\lambda 1$  55.4 °C**  
(intact;  $\approx 2$  ng/rxn)

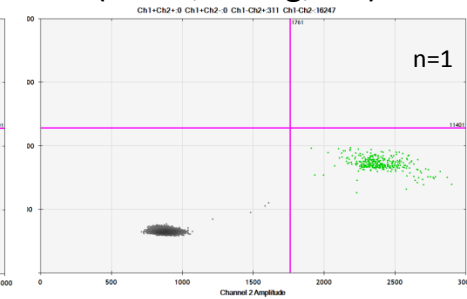

**MT  $\lambda 1$  53.0 °C**  
(intact;  $\approx 8$  ng/rxn)

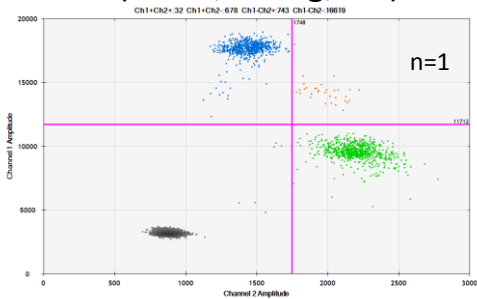

Threshold=> Ch1: 11712, Ch2: 1748

**MT  $\lambda 1$  53.0 °C**  
(intact;  $\approx 2$  ng/rxn)

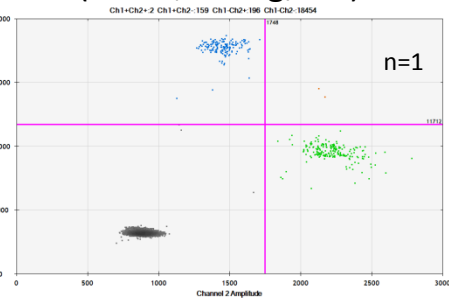

**WT  $\lambda 1$  53.0 °C**  
(intact;  $\approx 8$  ng/rxn)

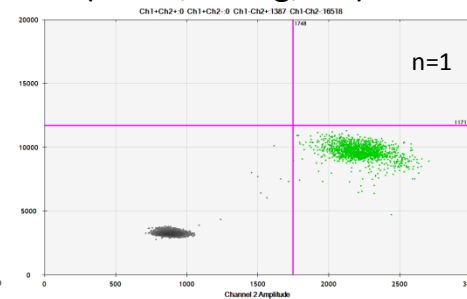

**WT  $\lambda 1$  53.0 °C**  
(intact;  $\approx 2$  ng/rxn)

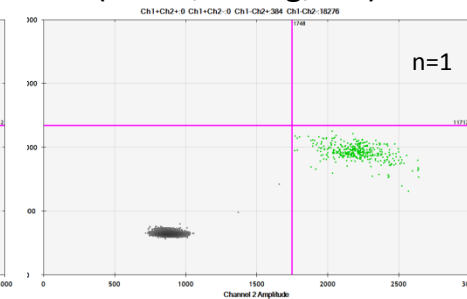

# NRAS A59T FAM/Cal Fluo Orange 650 (FAM/HEX settings). Same threshold settled for each temperature

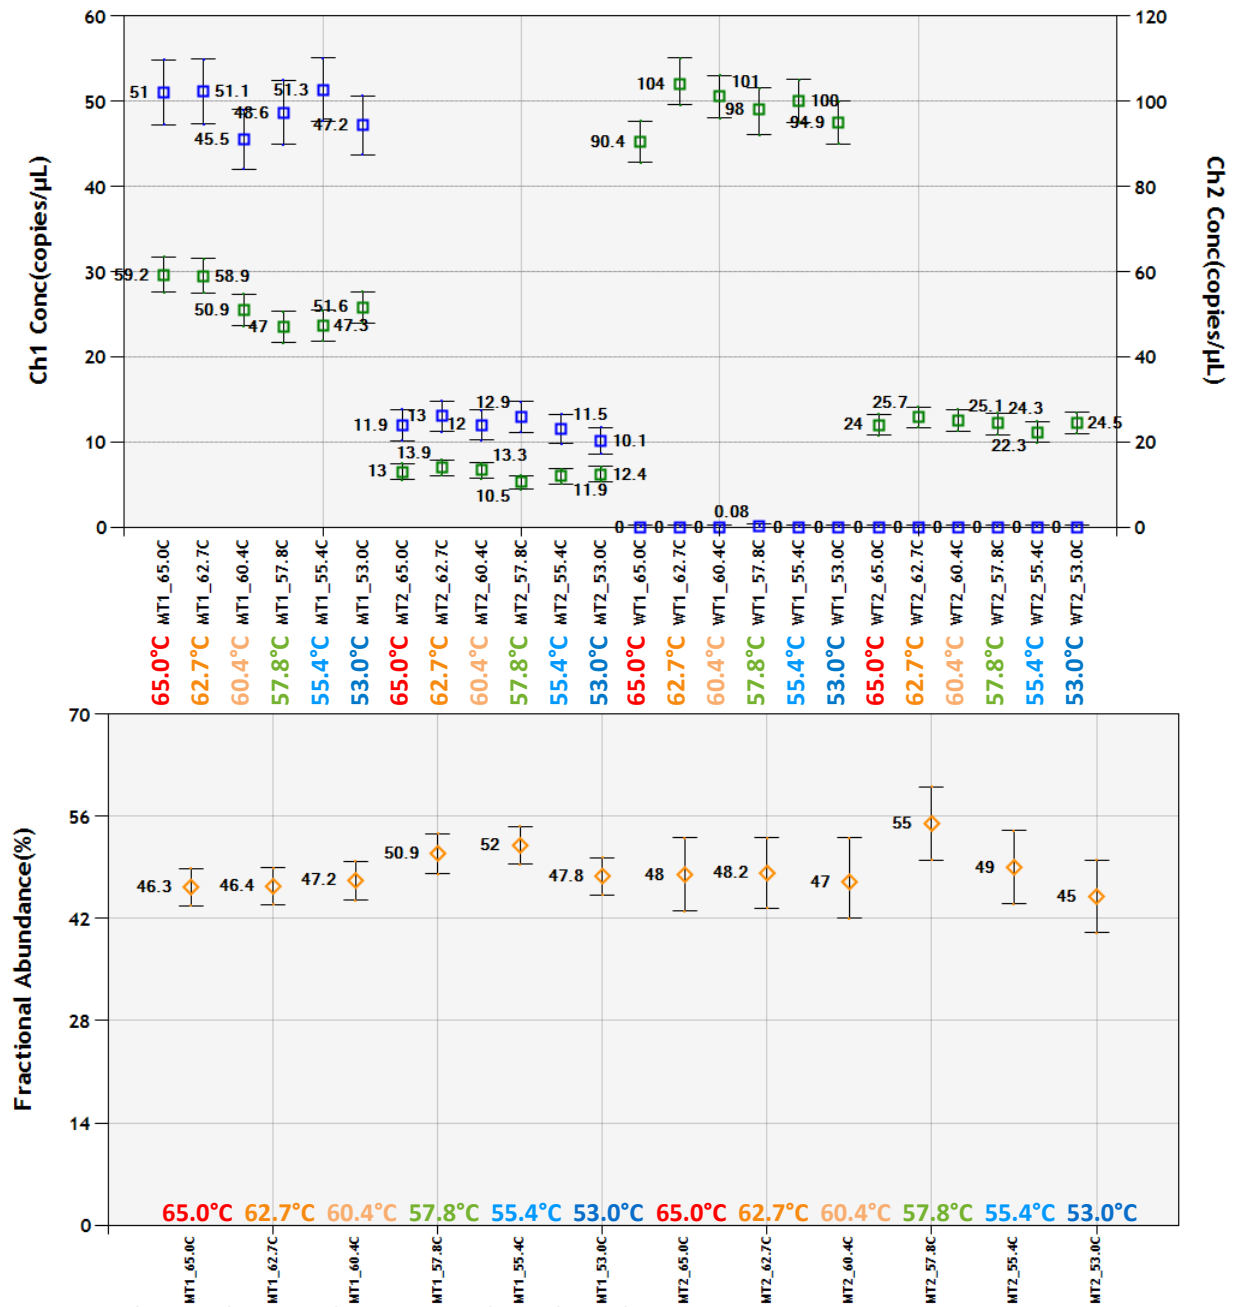

# NRAS A59T FAM/Cal Fluo Orange 650 (FAM/HEX settings). Same threshold settled for each temperature

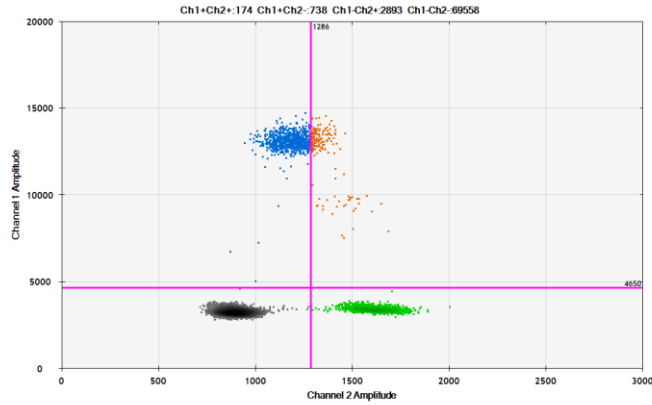

**MT  $\lambda$ 1 62.7 °C**  
(intact;  $\approx$  8 ng/rxn)

**“lasso corrected”**

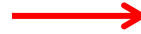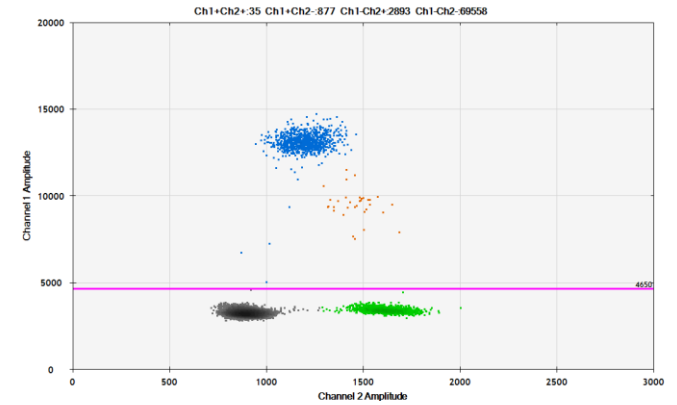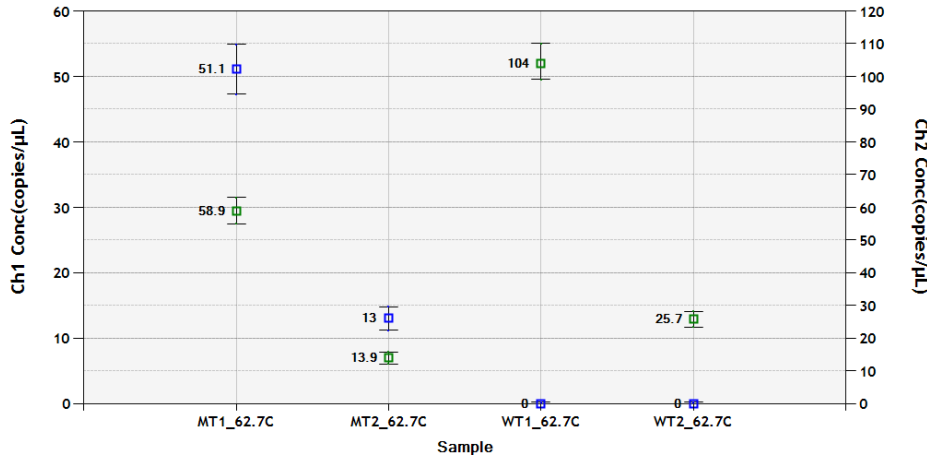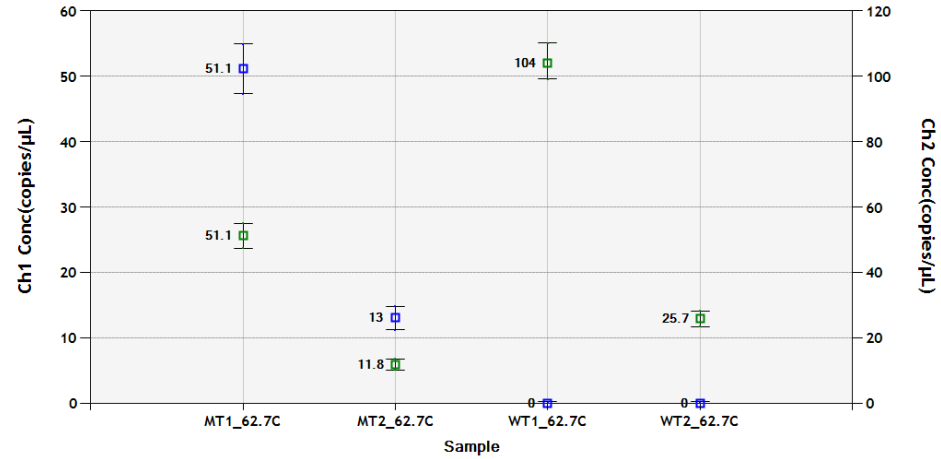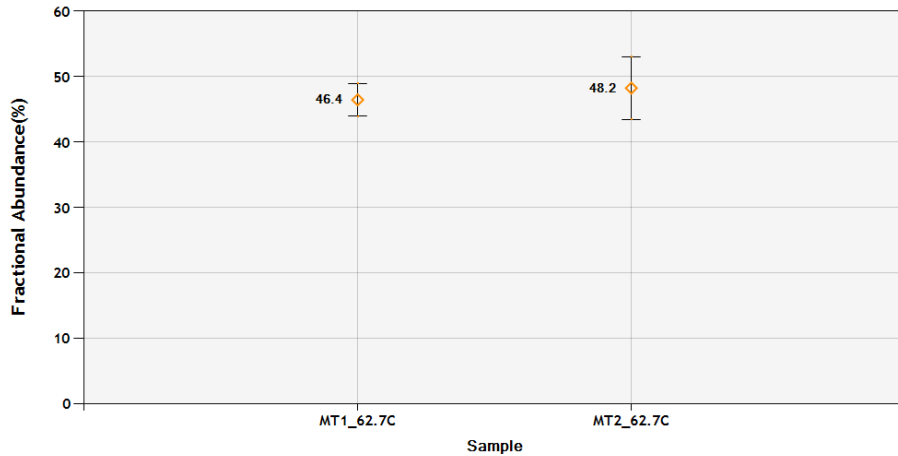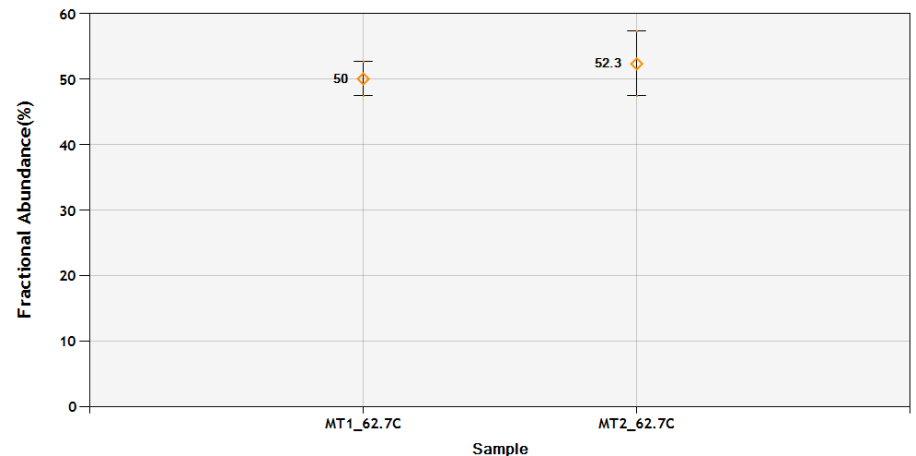

# Assay: PI3KCA E545K/WT (FAM/Cal Fluor Orange 650 (FAM/HEX settings)).

**MT  $\lambda 1$  65.0 °C**  
(intact;  $\approx 40$  ng/rxn)

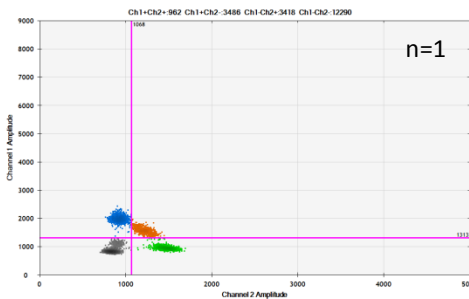

Threshold=> Ch1: 1313, Ch2: 1068

**MT  $\lambda 1$  65.0 °C**  
(intact;  $\approx 8$  ng/rxn)

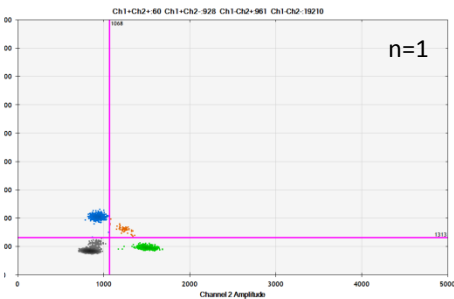

**WT  $\lambda 1$  65.0 °C**  
(intact;  $\approx 40$  ng/rxn)

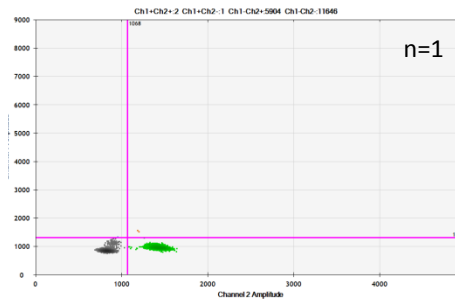

**WT  $\lambda 1$  65.0 °C**  
(intact;  $\approx 8$  ng/rxn)

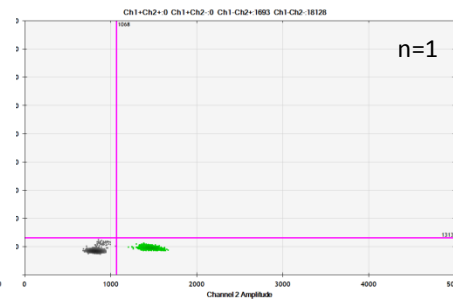

**MT  $\lambda 1$  62.7 °C**  
(intact;  $\approx 40$  ng/rxn)

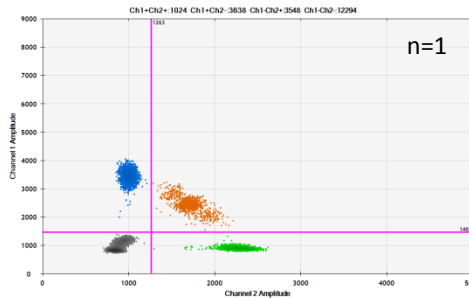

Threshold=> Ch1: 1469, Ch2: 1263

**MT  $\lambda 1$  62.7 °C**  
(intact;  $\approx 8$  ng/rxn)

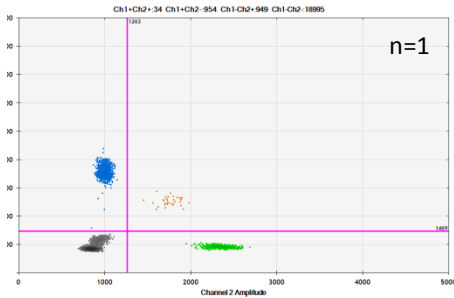

**WT  $\lambda 1$  62.7 °C**  
(intact;  $\approx 40$  ng/rxn)

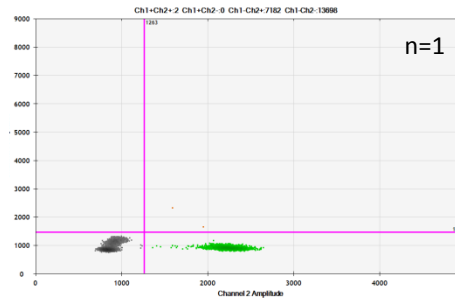

**WT  $\lambda 1$  62.7 °C**  
(intact;  $\approx 8$  ng/rxn)

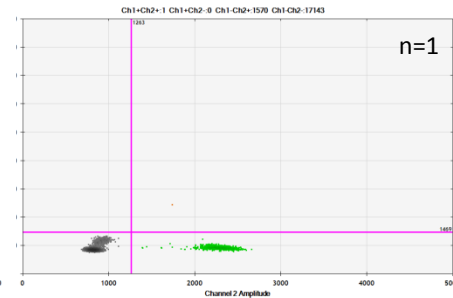

**MT  $\lambda 1$  60.4 °C**  
(intact;  $\approx 40$  ng/rxn)

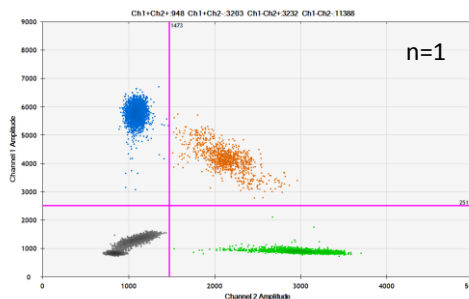

Threshold=> Ch1: 2513, Ch2: 1473

**MT  $\lambda 1$  60.4 °C**  
(intact;  $\approx 8$  ng/rxn)

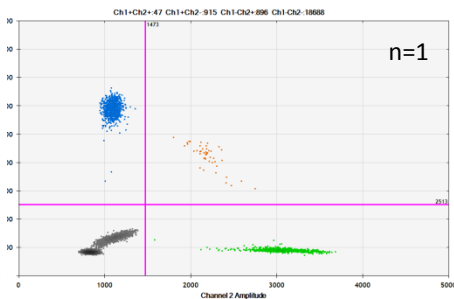

**WT  $\lambda 1$  60.4 °C**  
(intact;  $\approx 40$  ng/rxn)

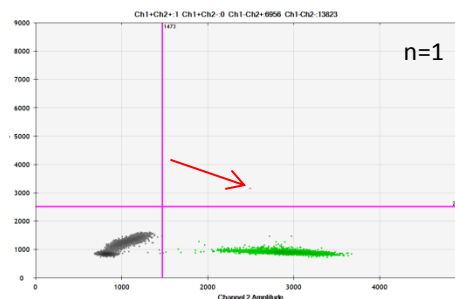

**WT  $\lambda 1$  60.4 °C**  
(intact;  $\approx 8$  ng/rxn)

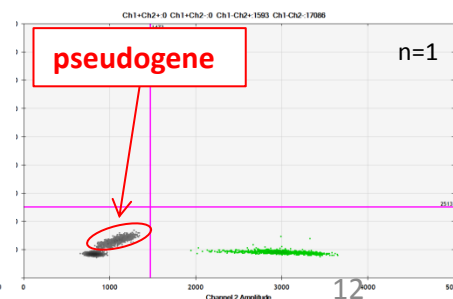

**PI3K E545K FAM/Cal Fluor Orange 650 (FAM/HEX settings).** Lasso was used to define the different populations of droplets (all wells within the same temperature at once)

**MT  $\lambda 1$  57.8 °C**  
(intact;  $\approx 40$  ng/rxn)

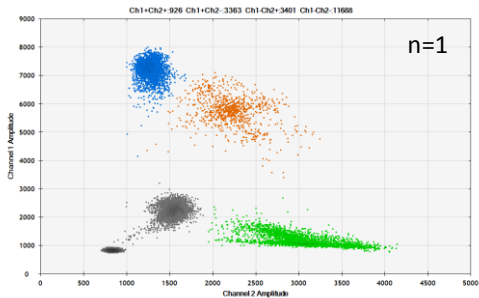

**MT  $\lambda 1$  57.8 °C**  
(intact;  $\approx 8$  ng/rxn)

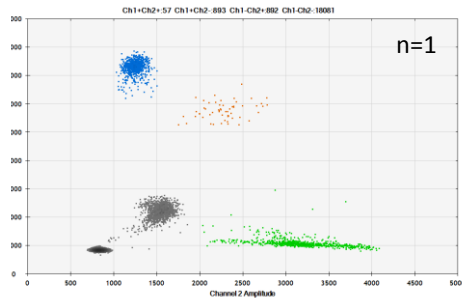

**WT  $\lambda 1$  57.8 °C**  
(intact;  $\approx 40$  ng/rxn)

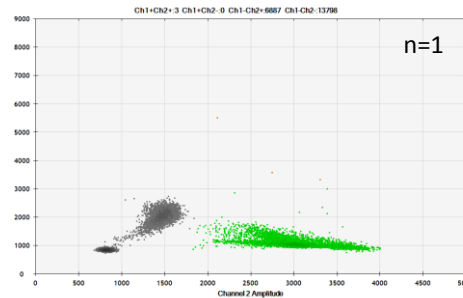

**WT  $\lambda 1$  57.8 °C**  
(intact;  $\approx 8$  ng/rxn)

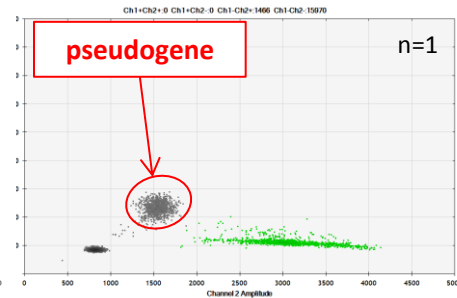

**MT  $\lambda 1$  55.4 °C**  
(intact;  $\approx 40$  ng/rxn)

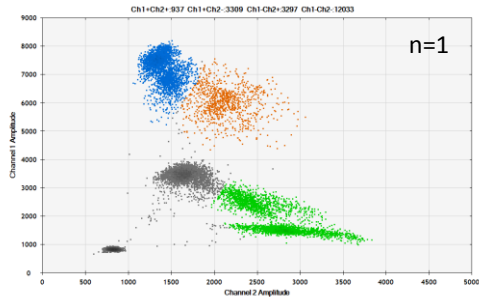

**MT  $\lambda 1$  55.4 °C**  
(intact;  $\approx 8$  ng/rxn)

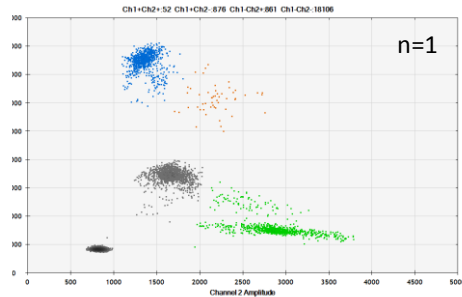

**WT  $\lambda 1$  55.4 °C**  
(intact;  $\approx 40$  ng/rxn)

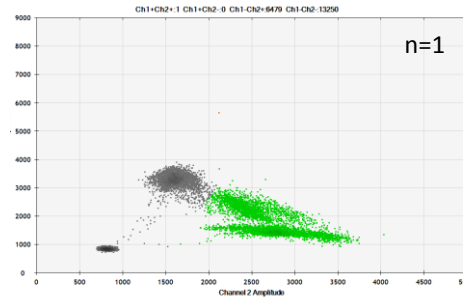

**WT  $\lambda 1$  55.4 °C**  
(intact;  $\approx 8$  ng/rxn)

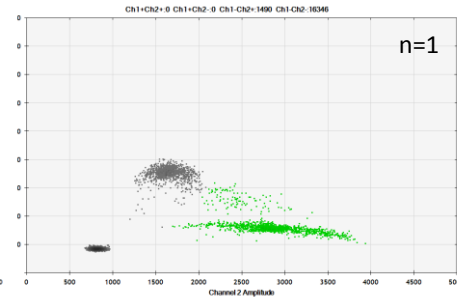

**MT  $\lambda 1$  53.0 °C**  
(intact;  $\approx 40$  ng/rxn)

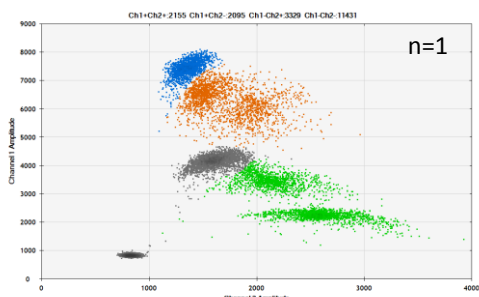

**MT  $\lambda 1$  53.0 °C**  
(intact;  $\approx 8$  ng/rxn)

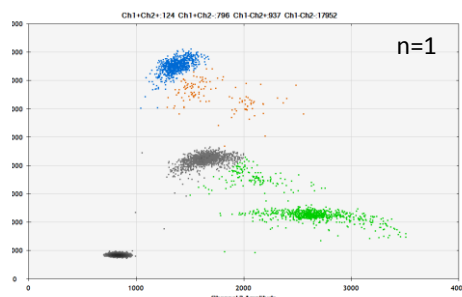

**WT  $\lambda 1$  53.0 °C**  
(intact;  $\approx 40$  ng/rxn)

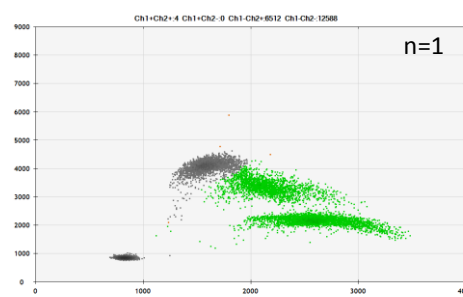

**WT  $\lambda 1$  53.0 °C**  
(intact;  $\approx 8$  ng/rxn)

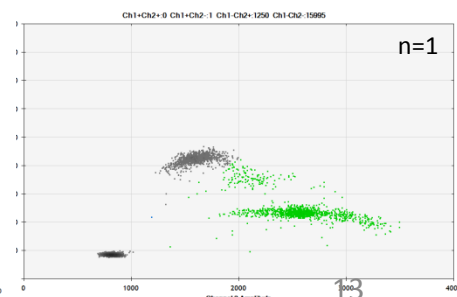

**PI3K E545K FAM/Cal Fluo Orange 650 (FAM/HEX settings). Lasso was used to define the different populations of droplets (all wells within the same temperature at once)**

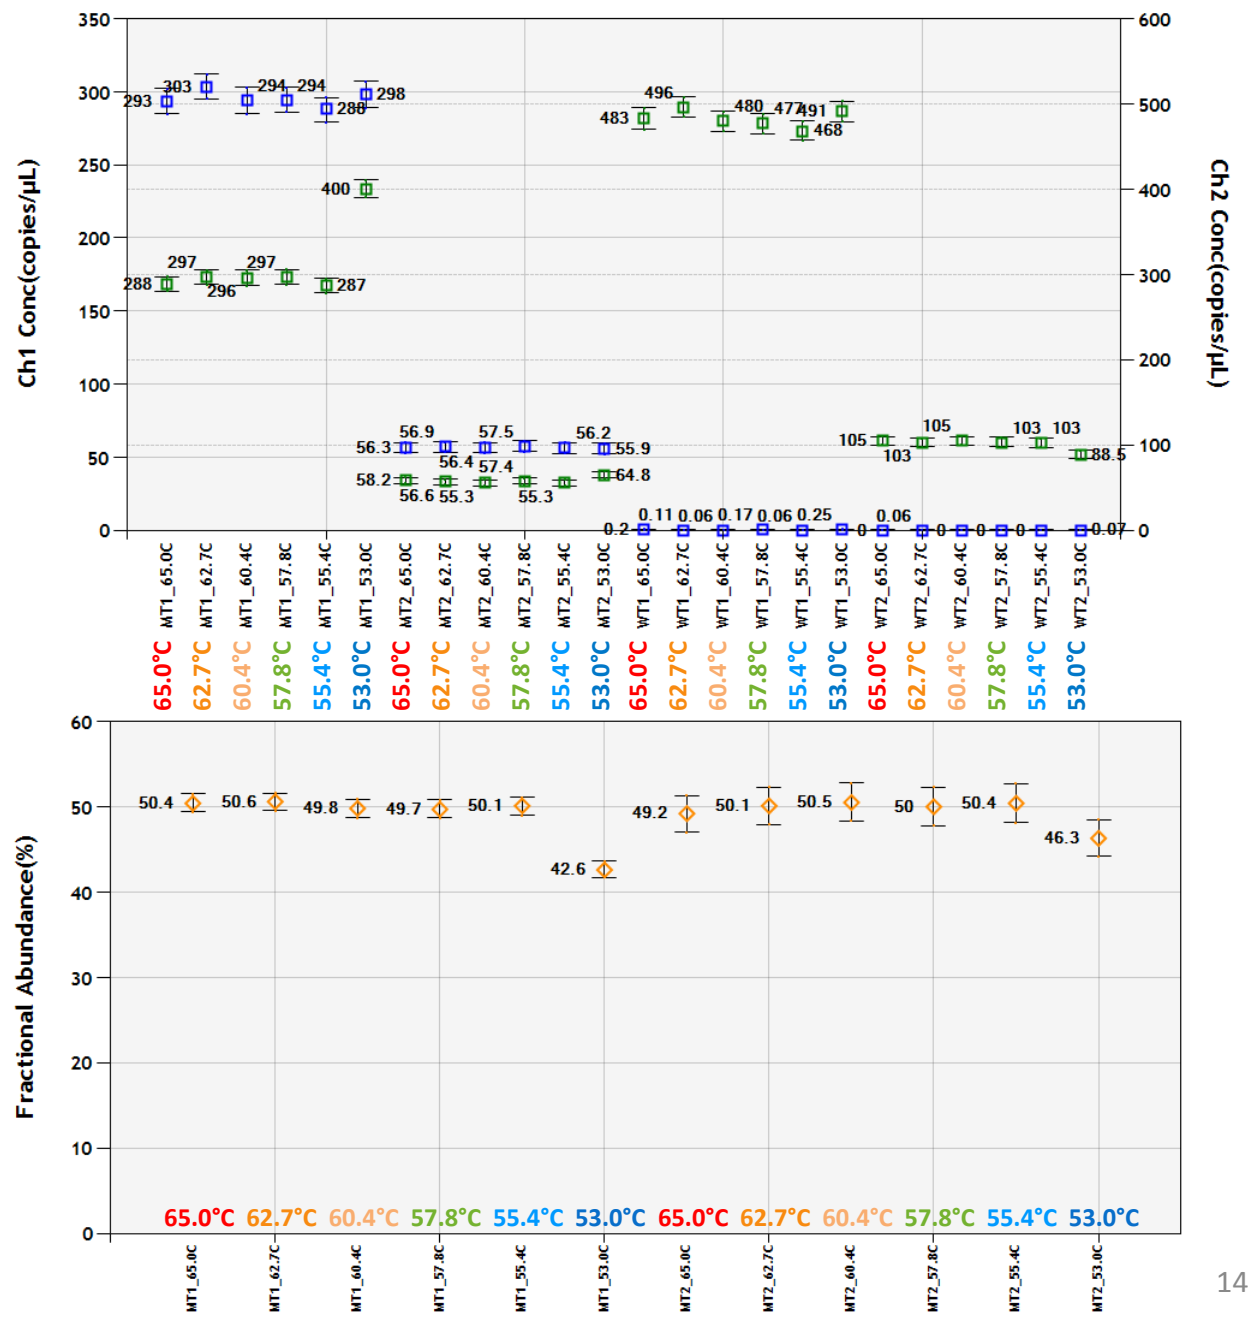

### 3. dPCR specificity testing (wet lab)

- Assays were tested for cross-reactivity with mutant targets in the same gene or homologous genes within the Multiplex I cfDNA Reference Standard panel using Horizon Reference Standards with 50% mAF of the non-specific mutant (40 ng/reaction) (n = 3).
- Both the presence of false positives (mutant probe binding non-specific template) or false negatives (wild-type probe not binding non-specific mutant template) were investigated
- No significant increases in mutant FPR or concentration of wild-type DNA were measured

| Assay        | Test template for specificity testing (Horizon P/N) |                                      |                              |
|--------------|-----------------------------------------------------|--------------------------------------|------------------------------|
| EGFR L858R   | EGFR T790M<br>(HD-C886)                             | EGFR $\Delta$ E746-A750<br>(HD-C887) | V769_D770insASV<br>(HD-C888) |
| KRAS G12D    | NRAS A59T<br>(HD-C891)                              | NRAS Q61K<br>(HD-C890)               |                              |
| NRAS A59T    | KRAS G12D<br>(HD-C889)                              | NRAS Q61K<br>(HD-C890)               |                              |
| PI3KCA E545K | N/A No other mutations to PIK3CA present in panel   |                                      |                              |

# Specificity testing (1): EGFR L858R/WT

**EGFR L858R assay (BR)**  
EGFR L858R template

(50% MT; 40ng/rxn)

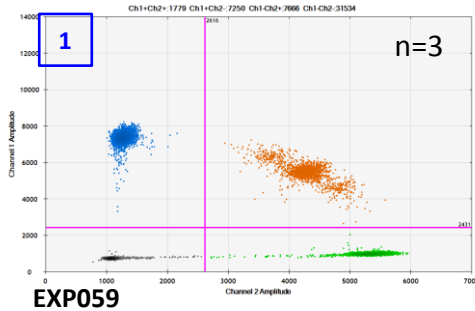

**EGFR L858R assay (BR)**  
EGFRdel template

(50% MT; 40ng/rxn)

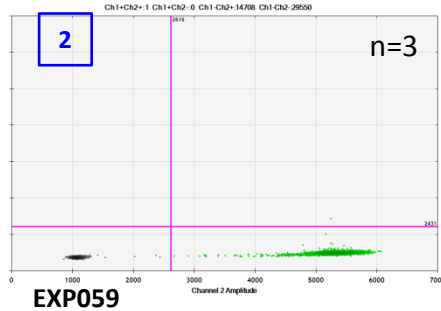

**EGFR L858R assay (BR)**  
EGFRins template

(50% MT; 40ng/rxn)

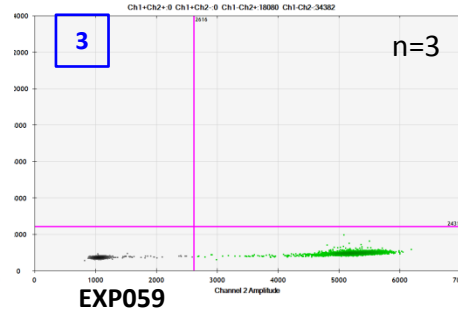

**EGFR L858R assay (BR)**  
EGFR T790M template

(50% MT; 40ng/rxn)

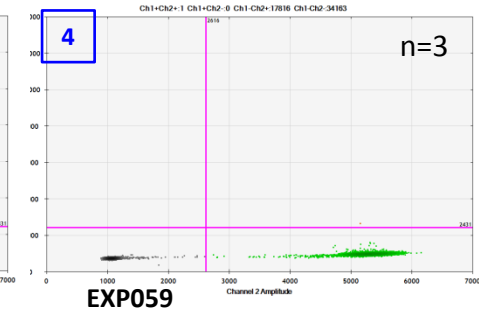

MT FPR (100% WT DNA): MT FPR ~ 0.006%  
0.001%

MT FPR ~ 0.000%

MT FPR ~ 0.004%

**WT detection with EGFR  
L858R assay (BS)**

|              | Average<br>(c/μL)  | Fold<br>change |
|--------------|--------------------|----------------|
| Specific     | <b>MT1 L858R 1</b> | <b>1026</b>    |
|              | MT1 x 2 (≈WT1)*    | <b>2051</b>    |
| Non-specific | MT1 del <b>2</b>   | 0.93           |
|              | MT1 ins <b>3</b>   | 0.97           |
|              | MT1 T790M <b>4</b> | 0.96           |

\*We didn't have WT1 template in this experiment, so we worked out the expected c/μL as the double of the one obtained in the MT1 template (50% mAF)



# Specificity testing (2): KRAS G12D/WT

## KRAS G12D assay (BR)

KRAS G12D template

(50% MT; 40ng/rxn)

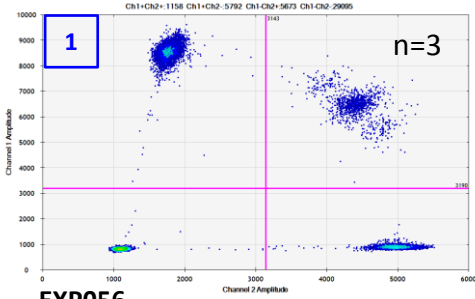

EXP056

## KRAS G12D assay (BR)

KRAS WT template

(100% WT; 40ng/rxn)

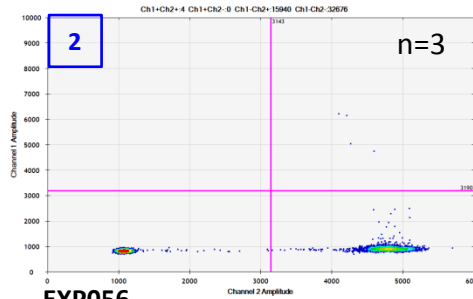

EXP056

MT FPR ≈ 0.020%

## KRAS G12D assay (BR)

NRAS Q61K template

(50% MT; 40ng/rxn)

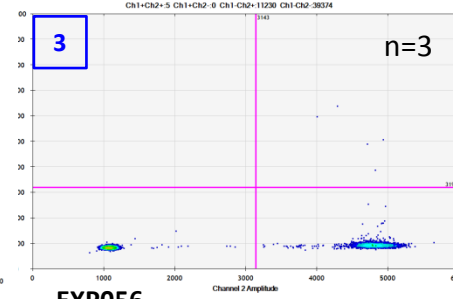

EXP056

MT FPR ~ 0.030%

## KRAS G12D assay (BR)

NRAS A59T template

(50% MT; 40ng/rxn)

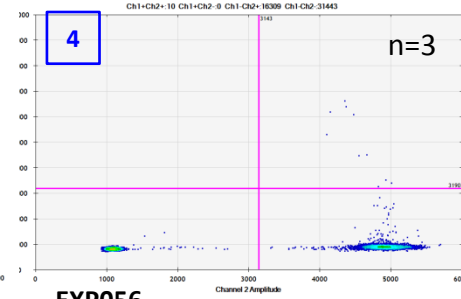

EXP056

MT FPR ~ 0.049%

## WT detection with KRAS G12D assay (BR)

Average  
(c/μL)

Fold  
change

|              |            |      |      |
|--------------|------------|------|------|
| Specific     | G12D MT1 1 | 843  |      |
|              | G12D WT1 2 | 1869 |      |
| Non-specific | A59T MT1 3 | 1967 | 1.05 |
|              | Q61K MT1 4 | 1869 | 1.00 |

# Specificity testing (3): NRAS A59T/WT

## NRAS A59T assay (BS)

NRAS A59T template

(50% MT; 40ng/rxn)

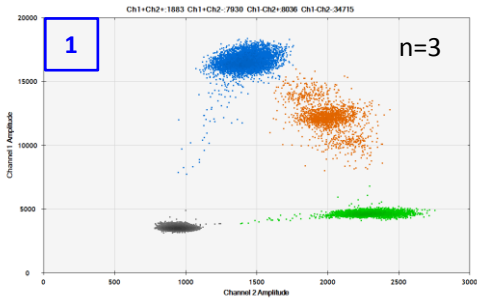

EXP057

## NRAS A59T assay (BS)

NRAS WT template

(100% WT; 40ng/rxn)

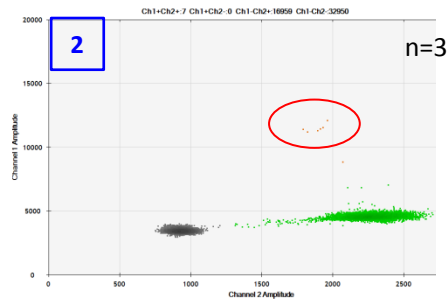

EXP057

MT FPR  $\approx$  0.035%

## NRAS A59T assay (BS)

NRAS Q61K template

(50% MT; 40ng/rxn)

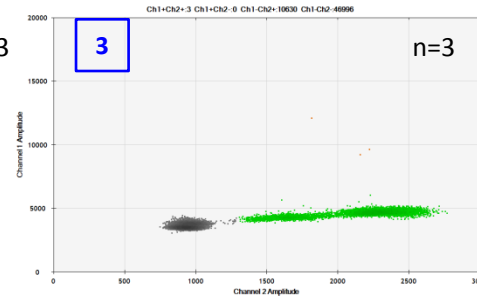

EXP057

MT FPR  $\sim$  0.006%

## NRAS A59T assay (BS)

KRAS G12D template

(50% MT; 40ng/rxn)

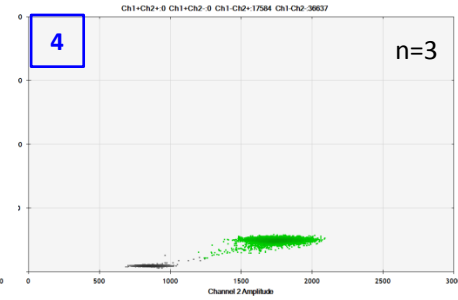

EXP057

MT FPR  $\sim$  0.016%

## WT detection with NRAS A59T assay (BS)

|              |                 | Average<br>(c/ $\mu$ L) | Fold<br>change |
|--------------|-----------------|-------------------------|----------------|
| Specific     | MT1 1           | 984                     |                |
|              | WT1 2           | 1955                    |                |
| Non-specific | NRAS Q61K MT1 3 | 1953                    | 1.00           |
|              | KRAS G12D MT1 4 | 2117                    | 1.08           |
